# Supplementary figures and images for: Mitochondrial Genomes, Phylogenetic Associations, and SNP Recovery for the Key Invasive Ponto-Caspian Amphipods in Europe
Source: MDPI journal article supplement (doi:10.3390/ijms221910300), 2021-09-24

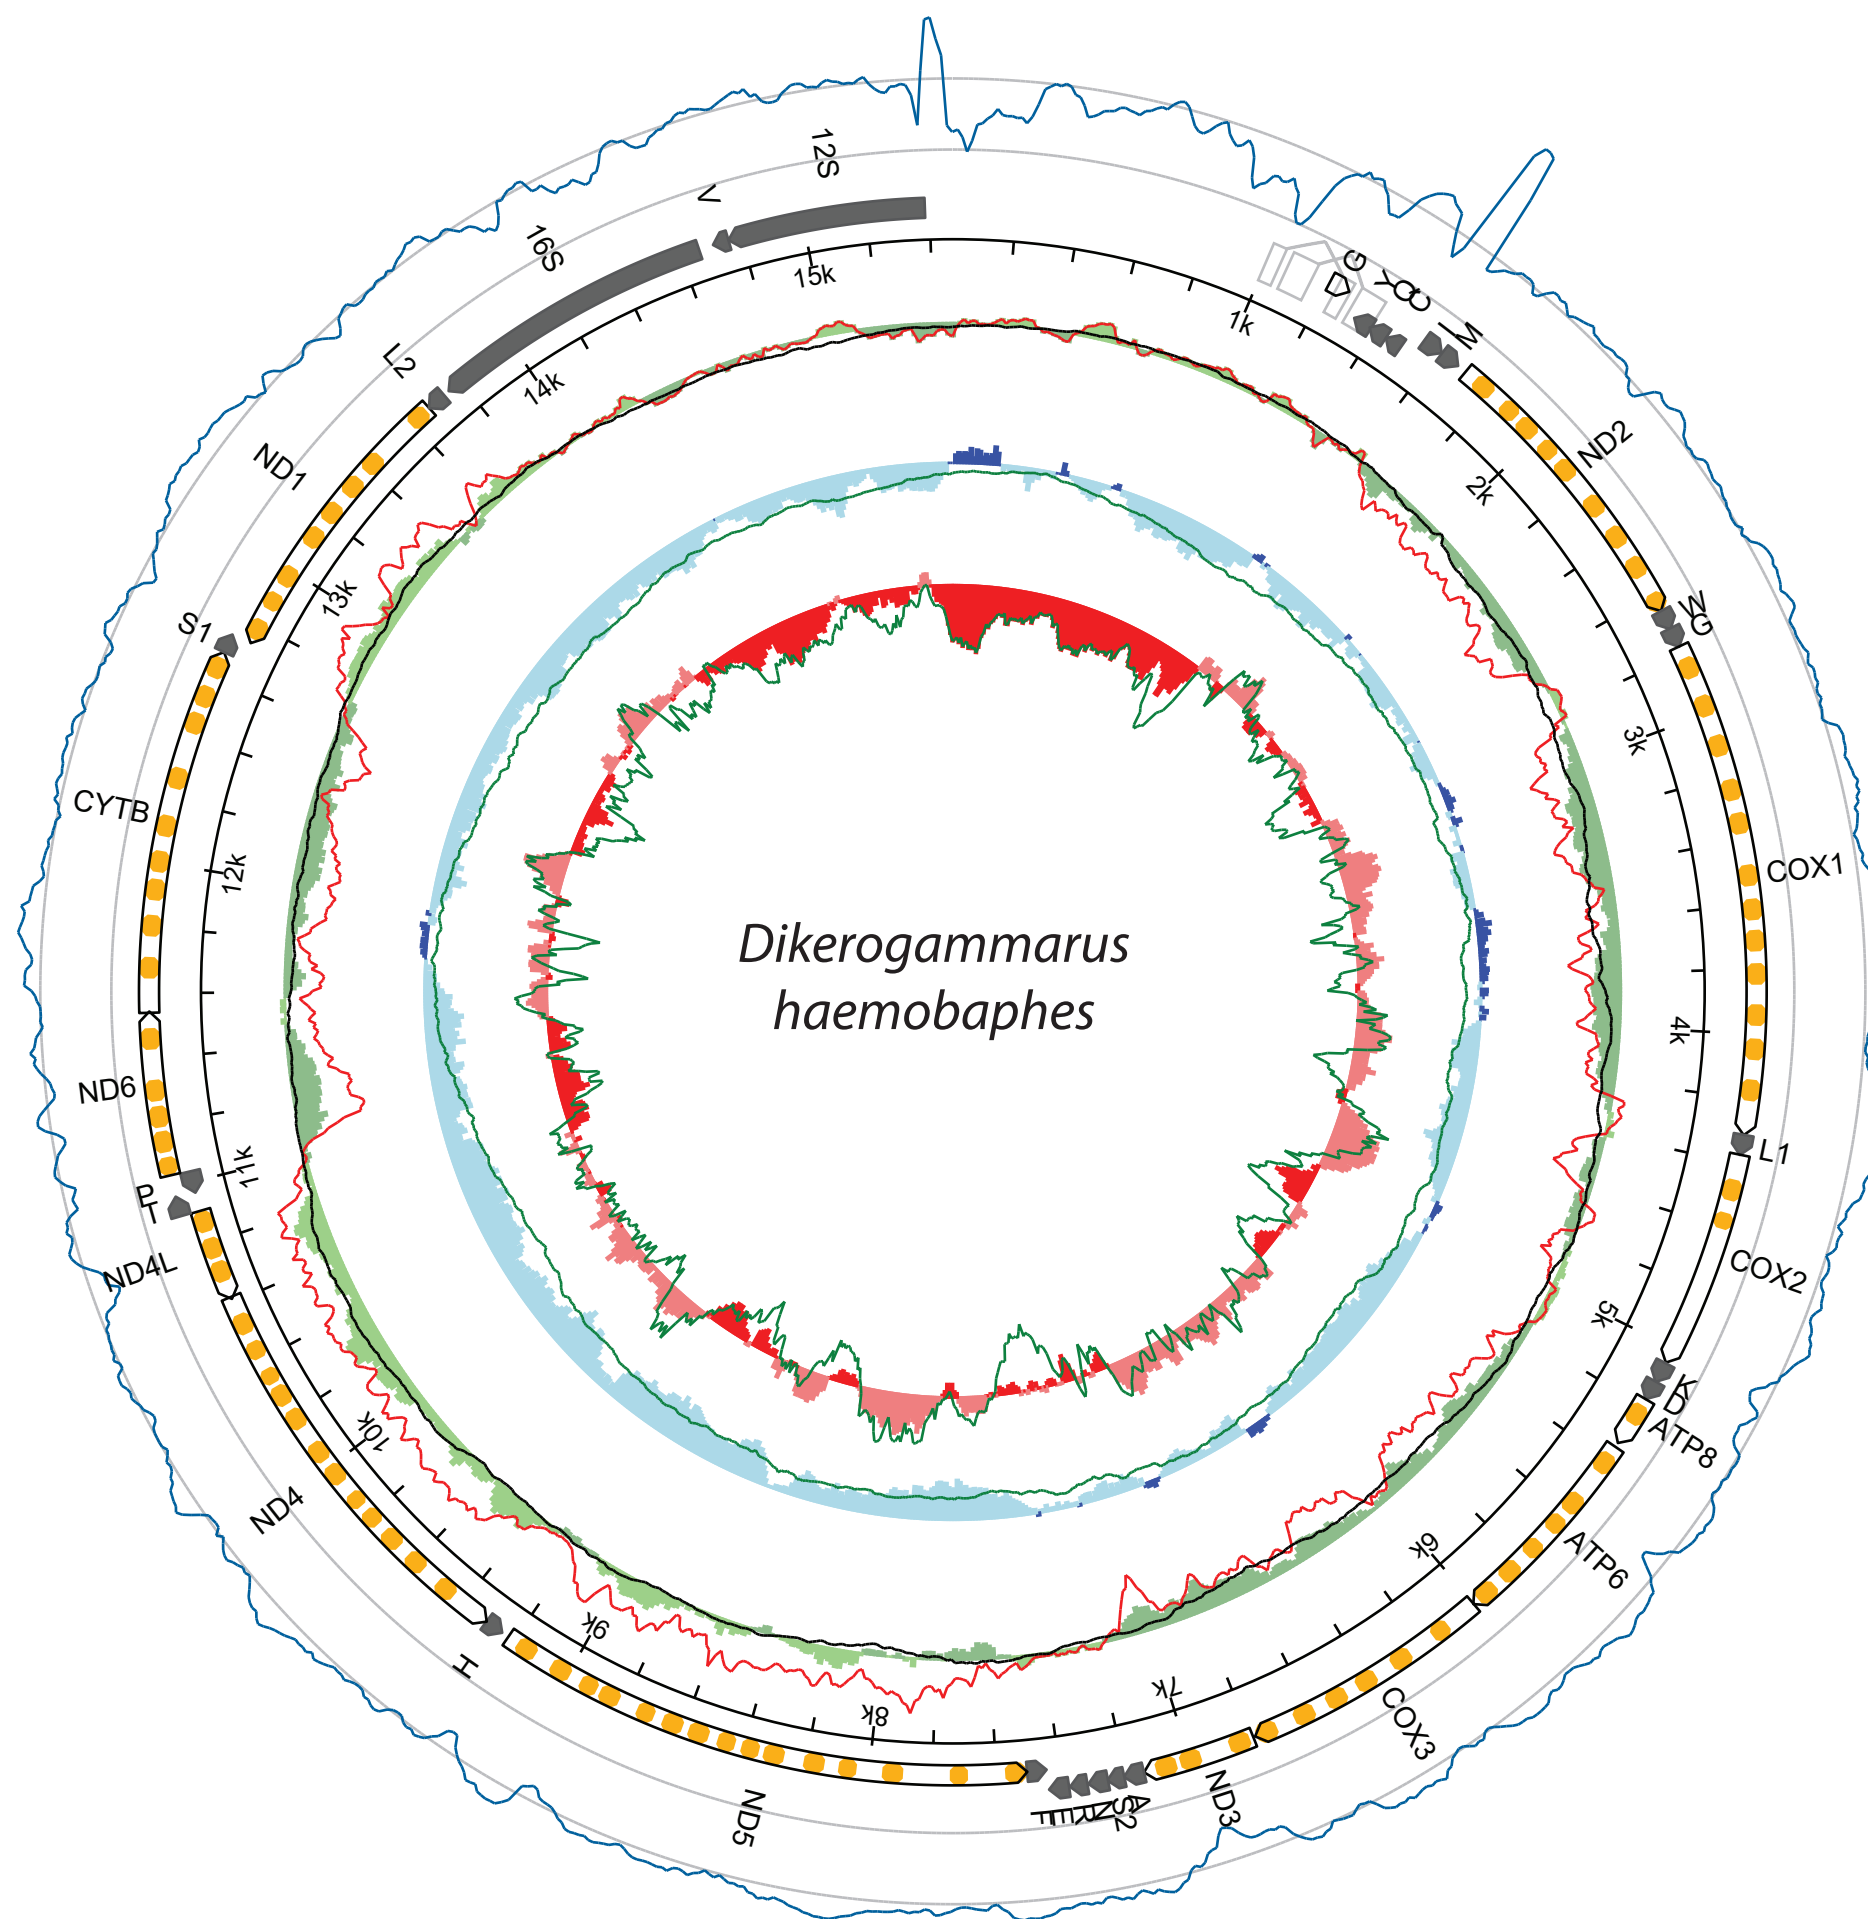

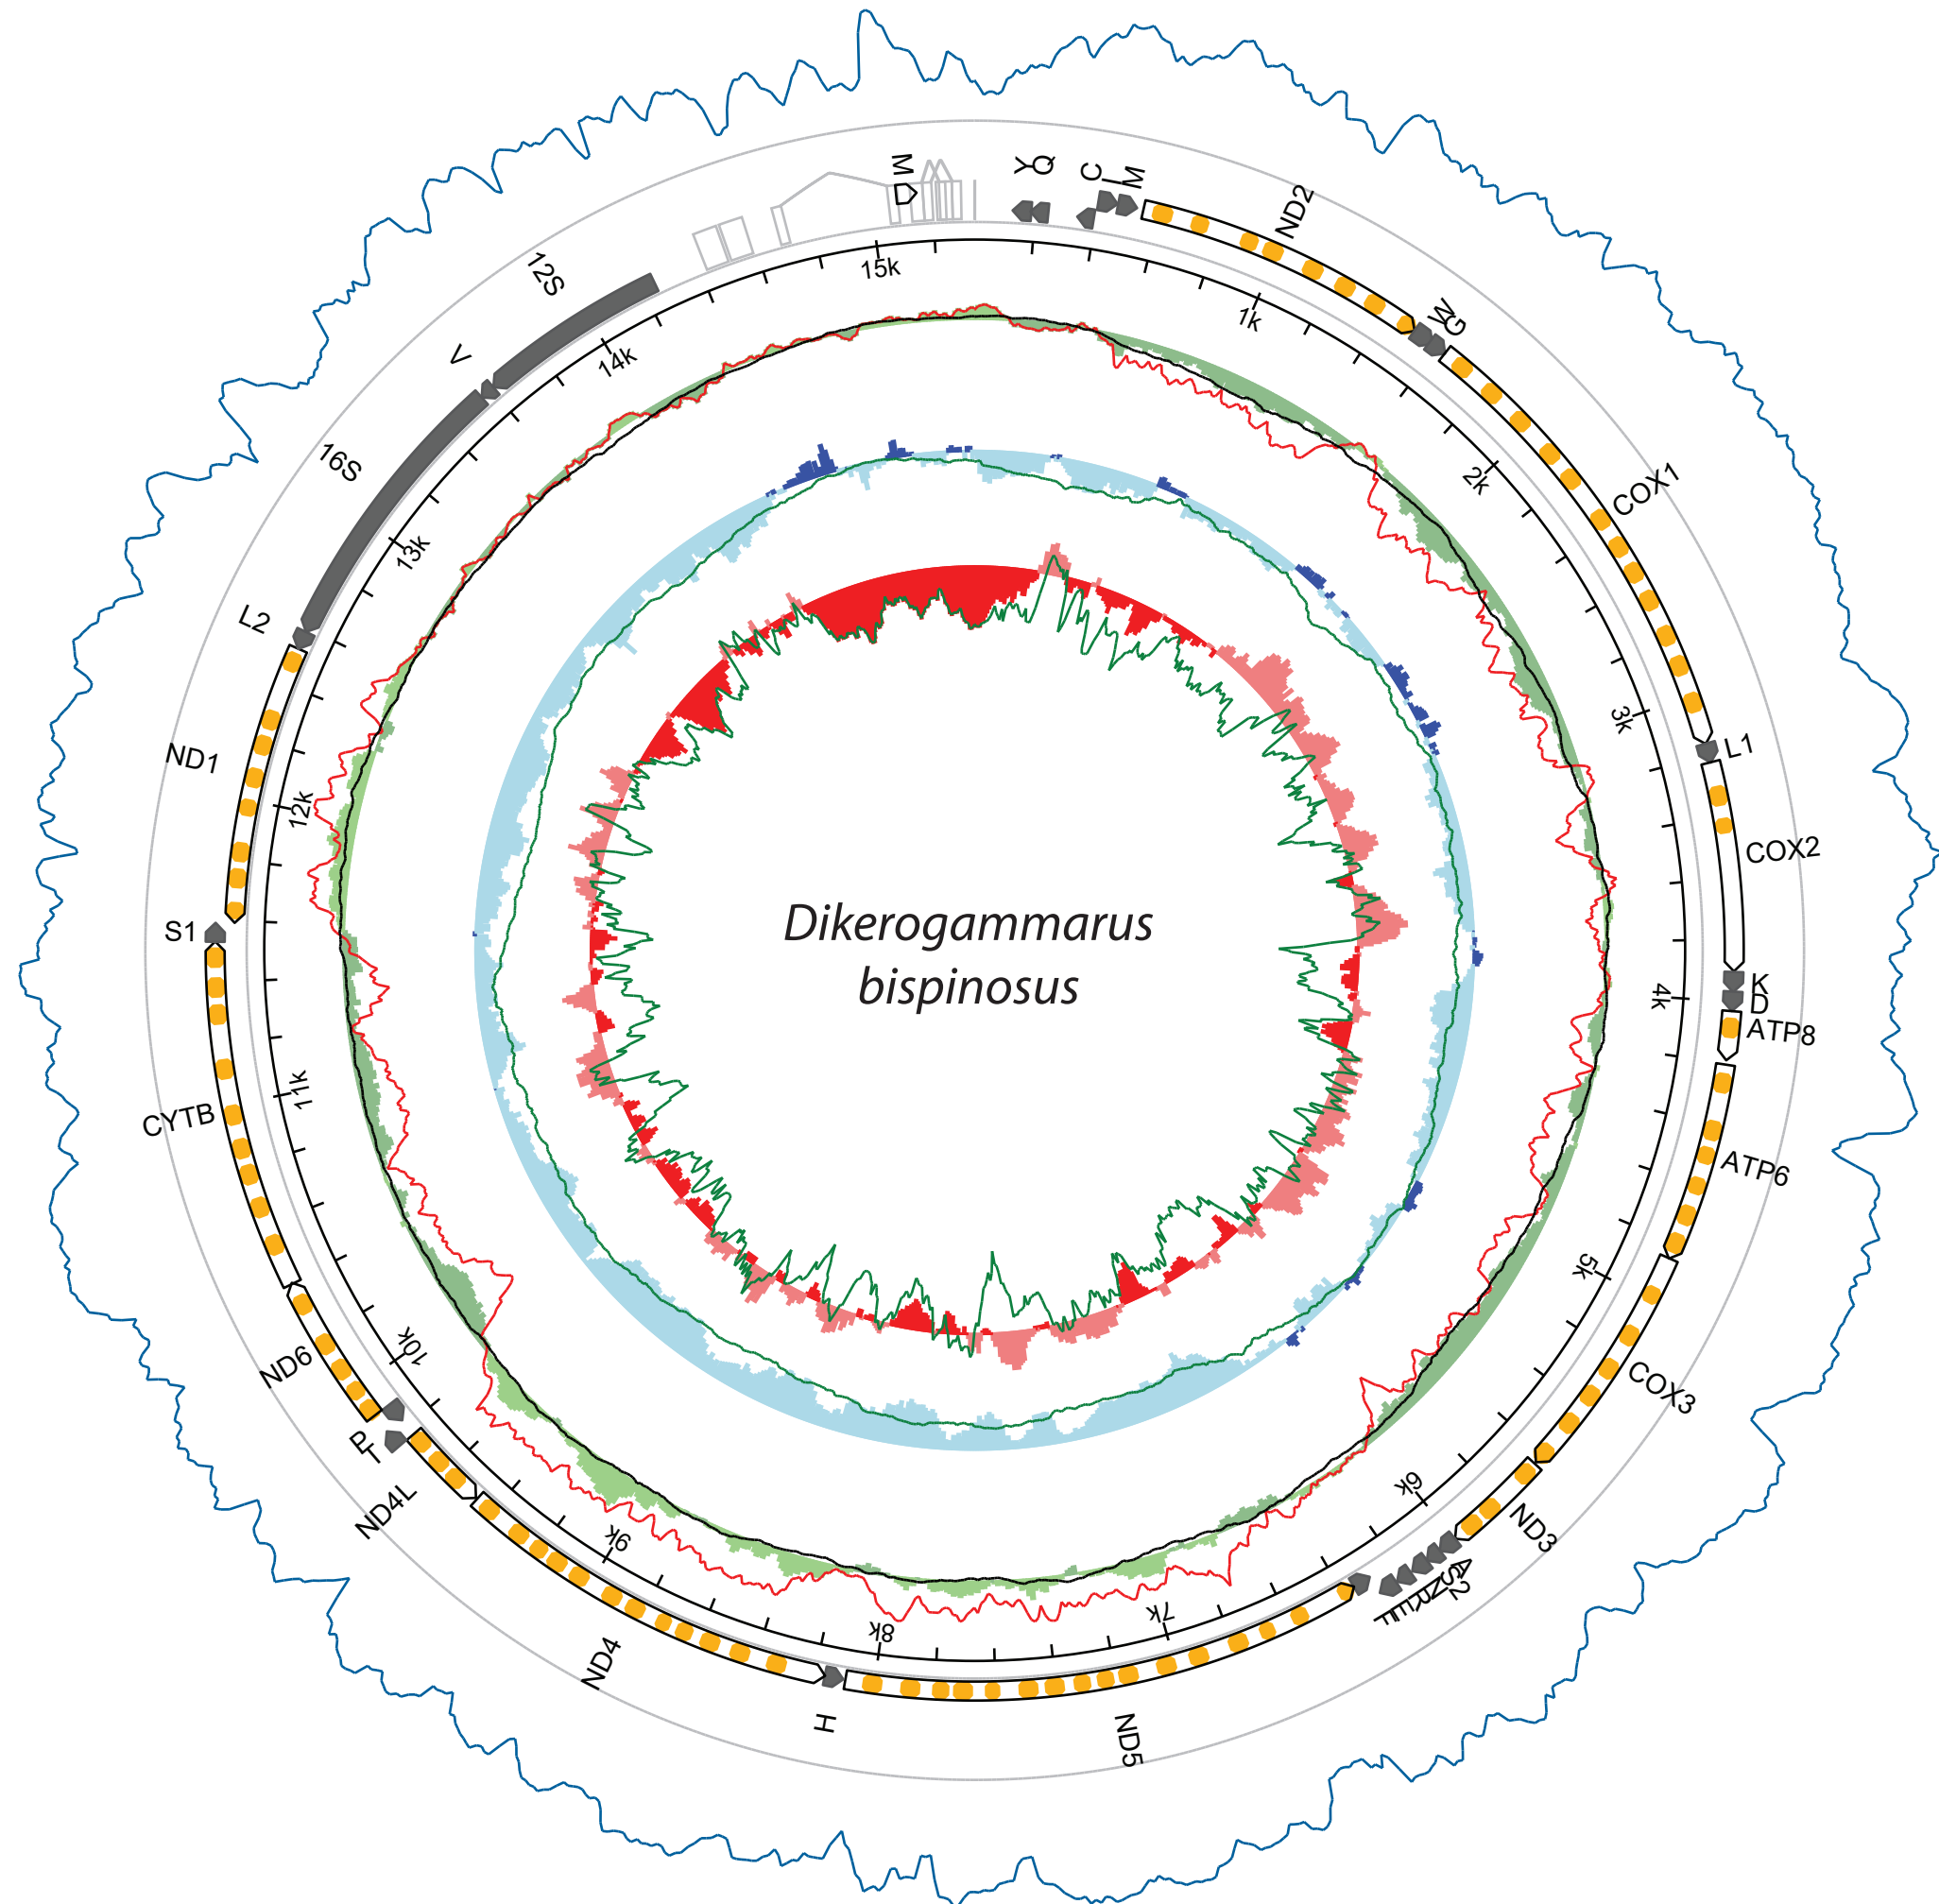

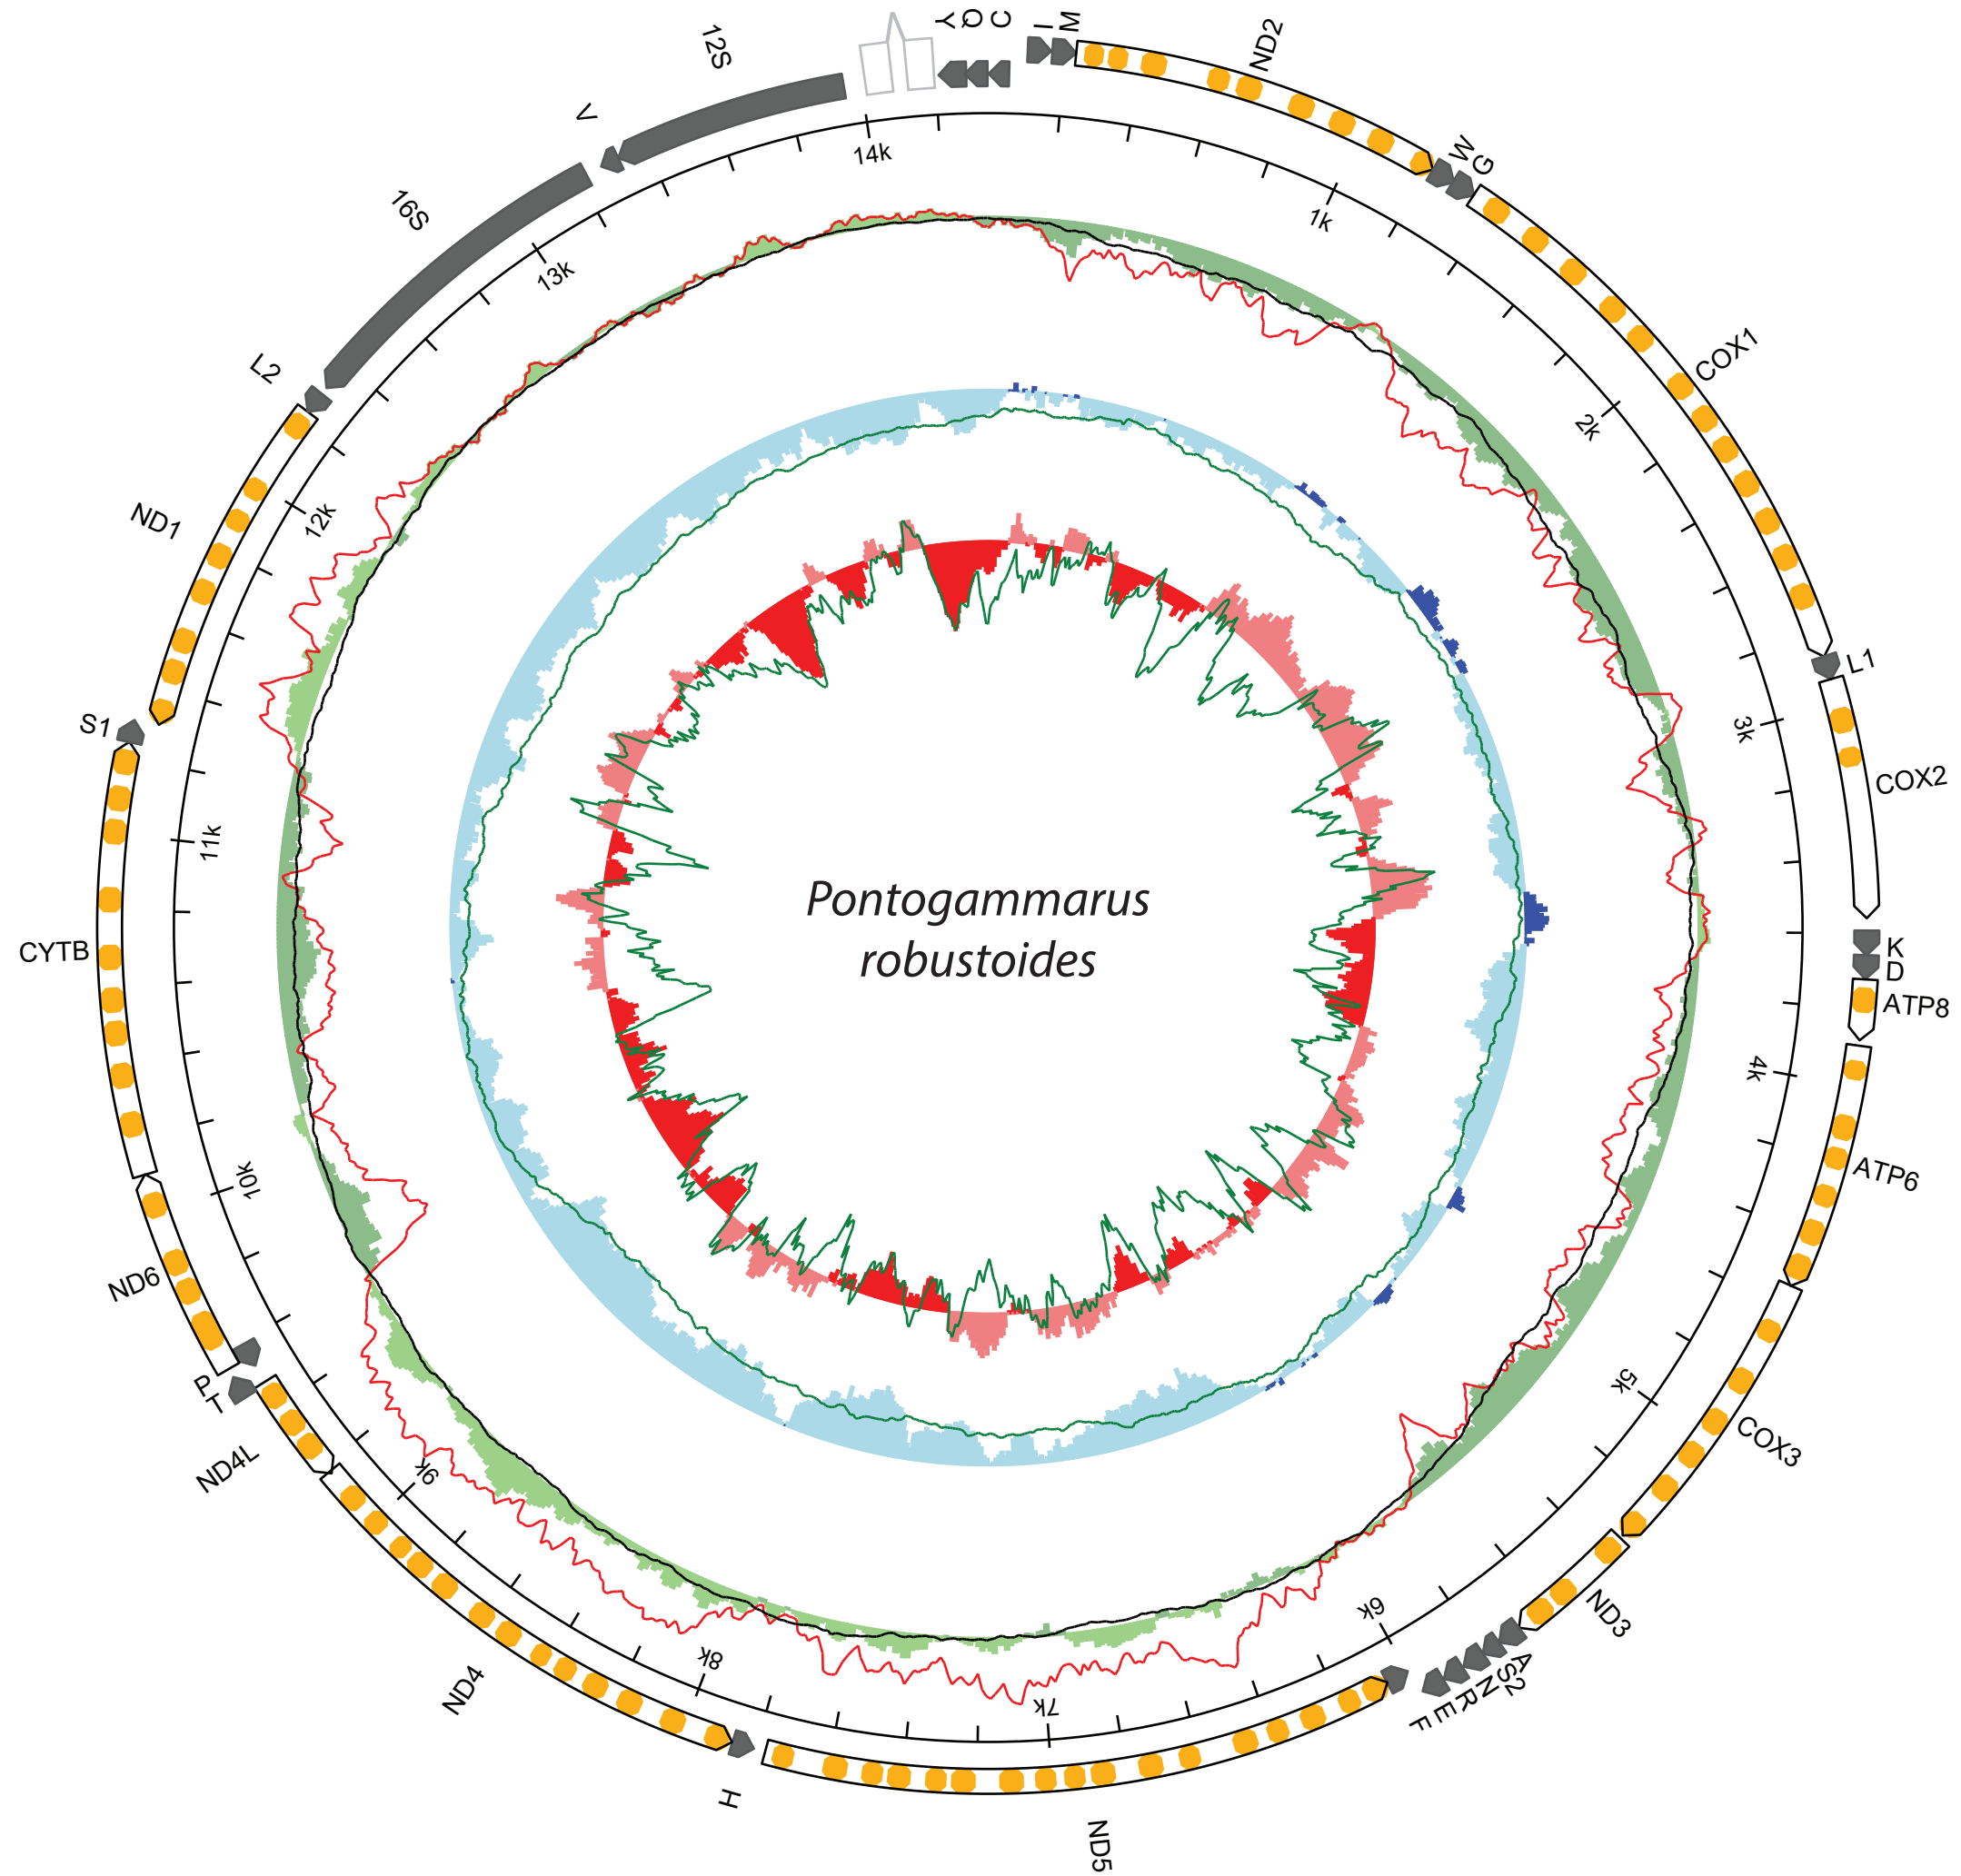

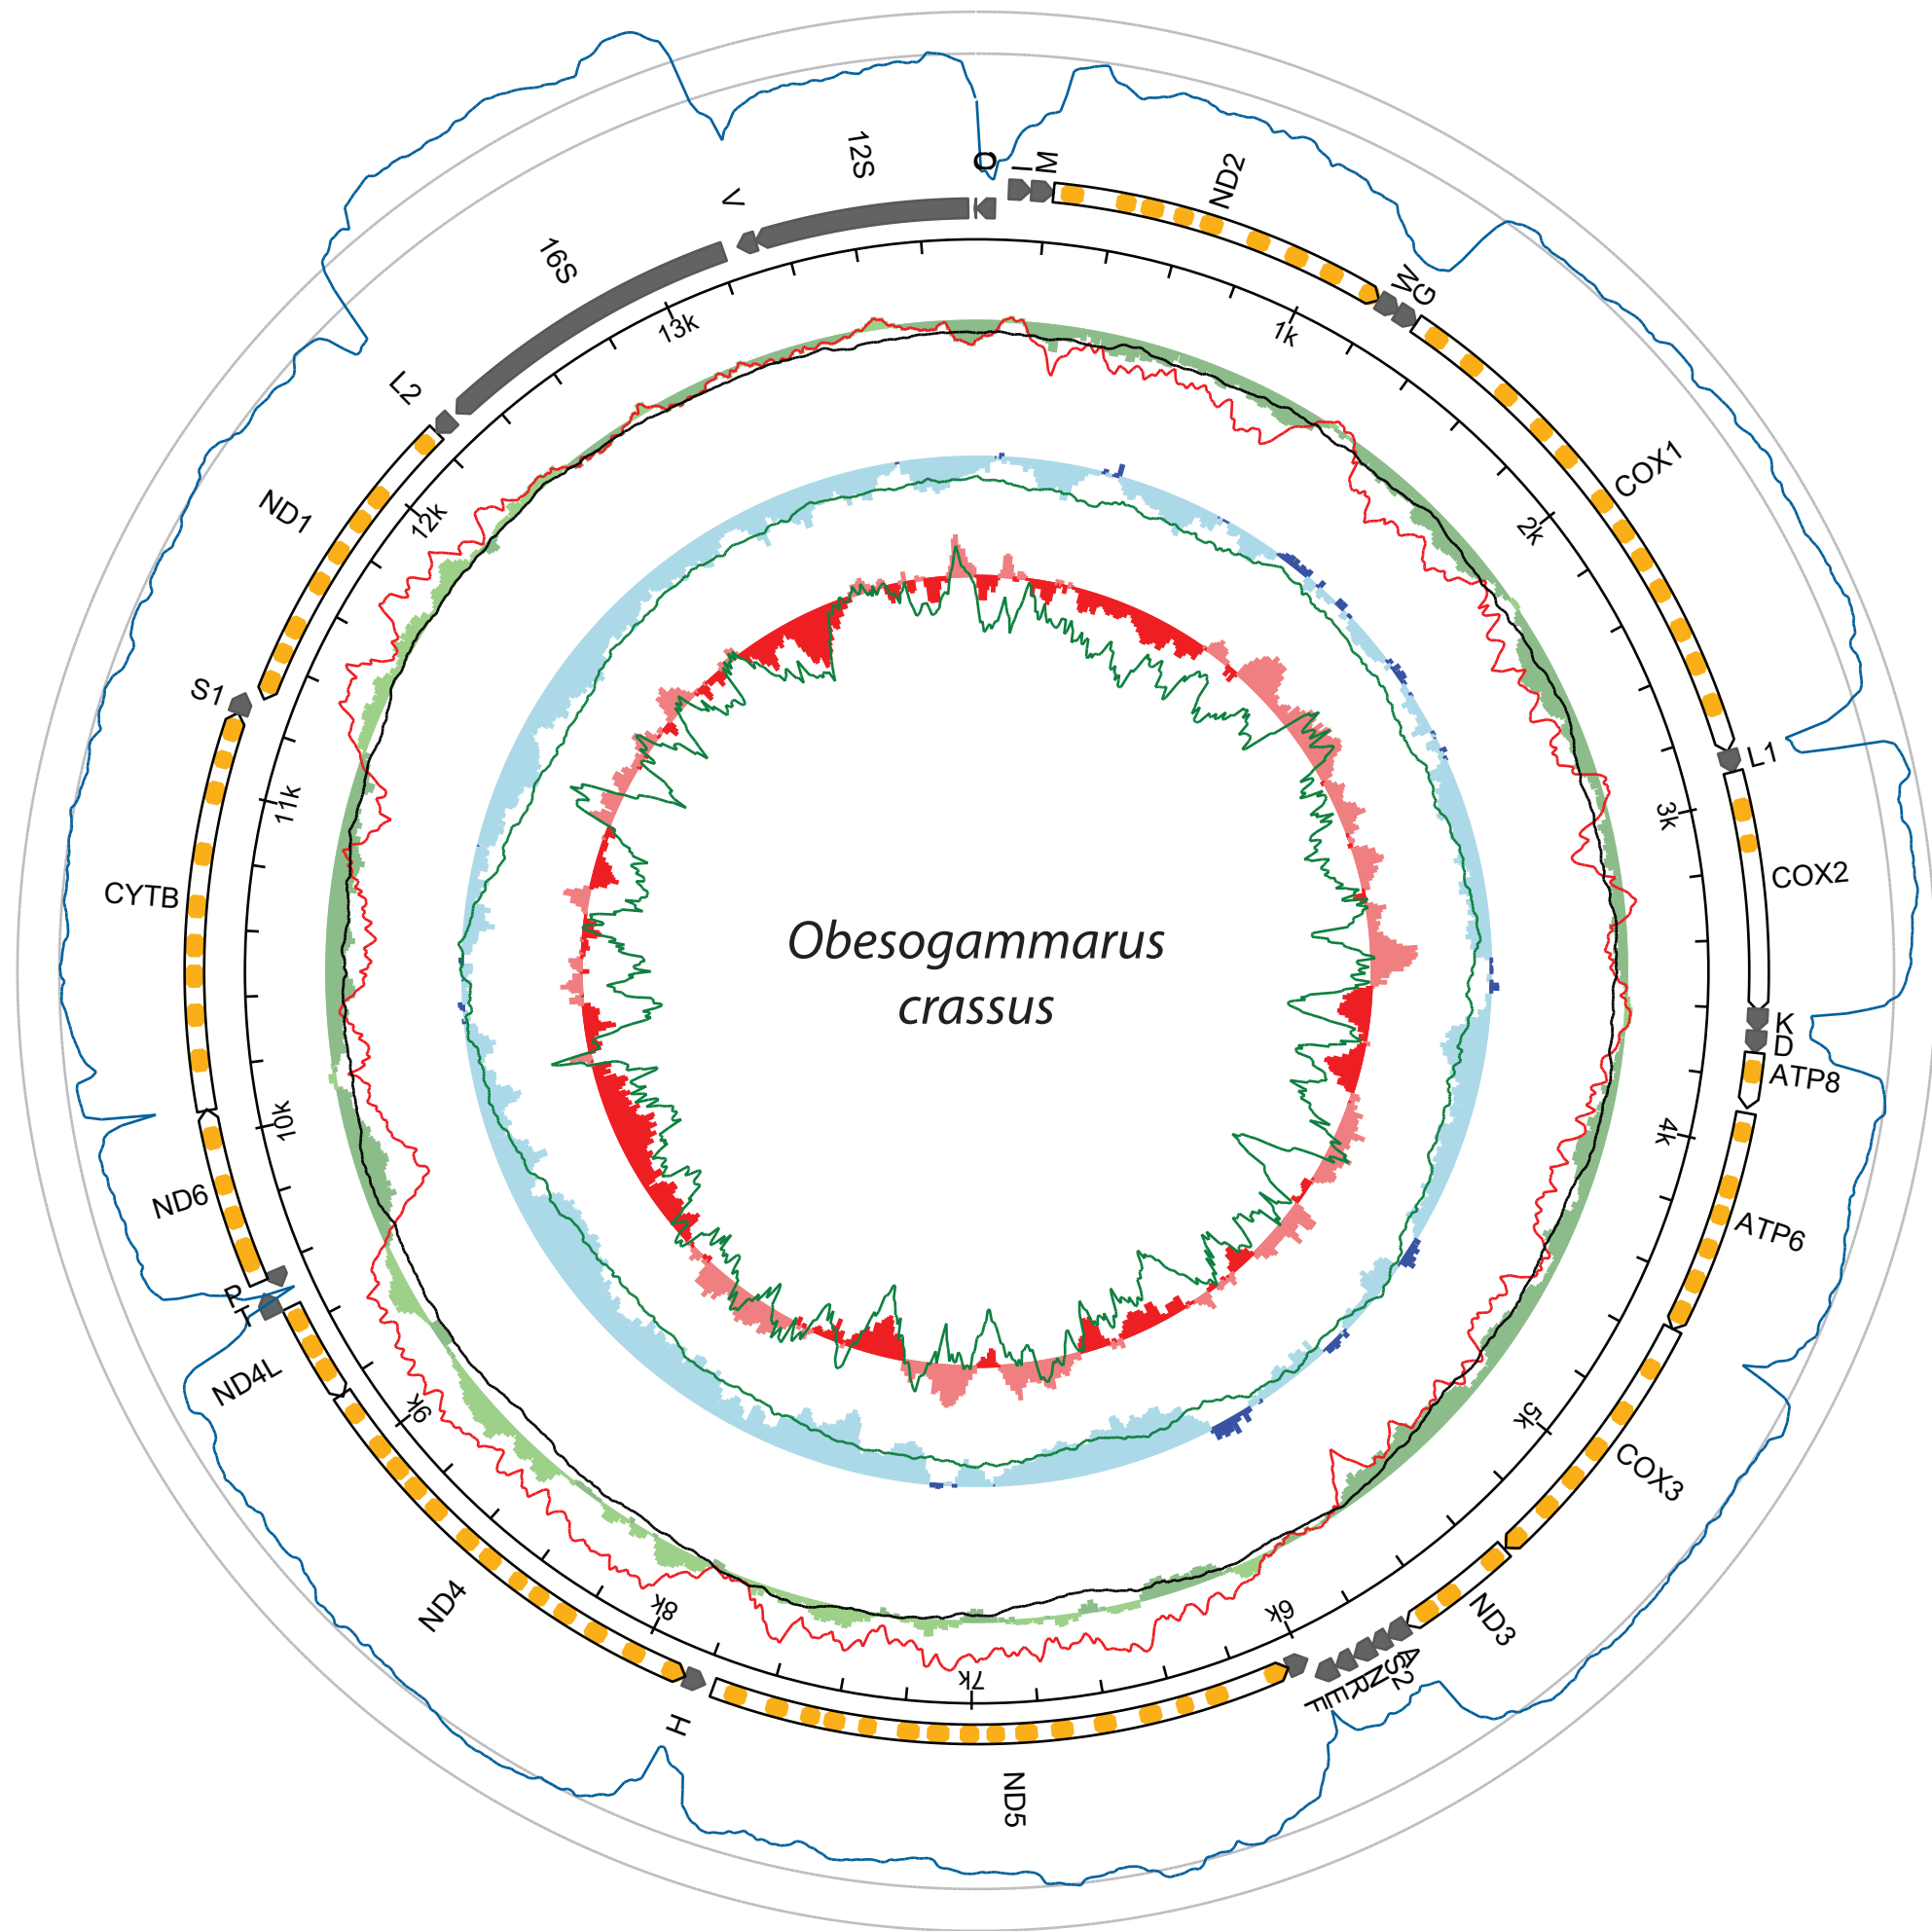



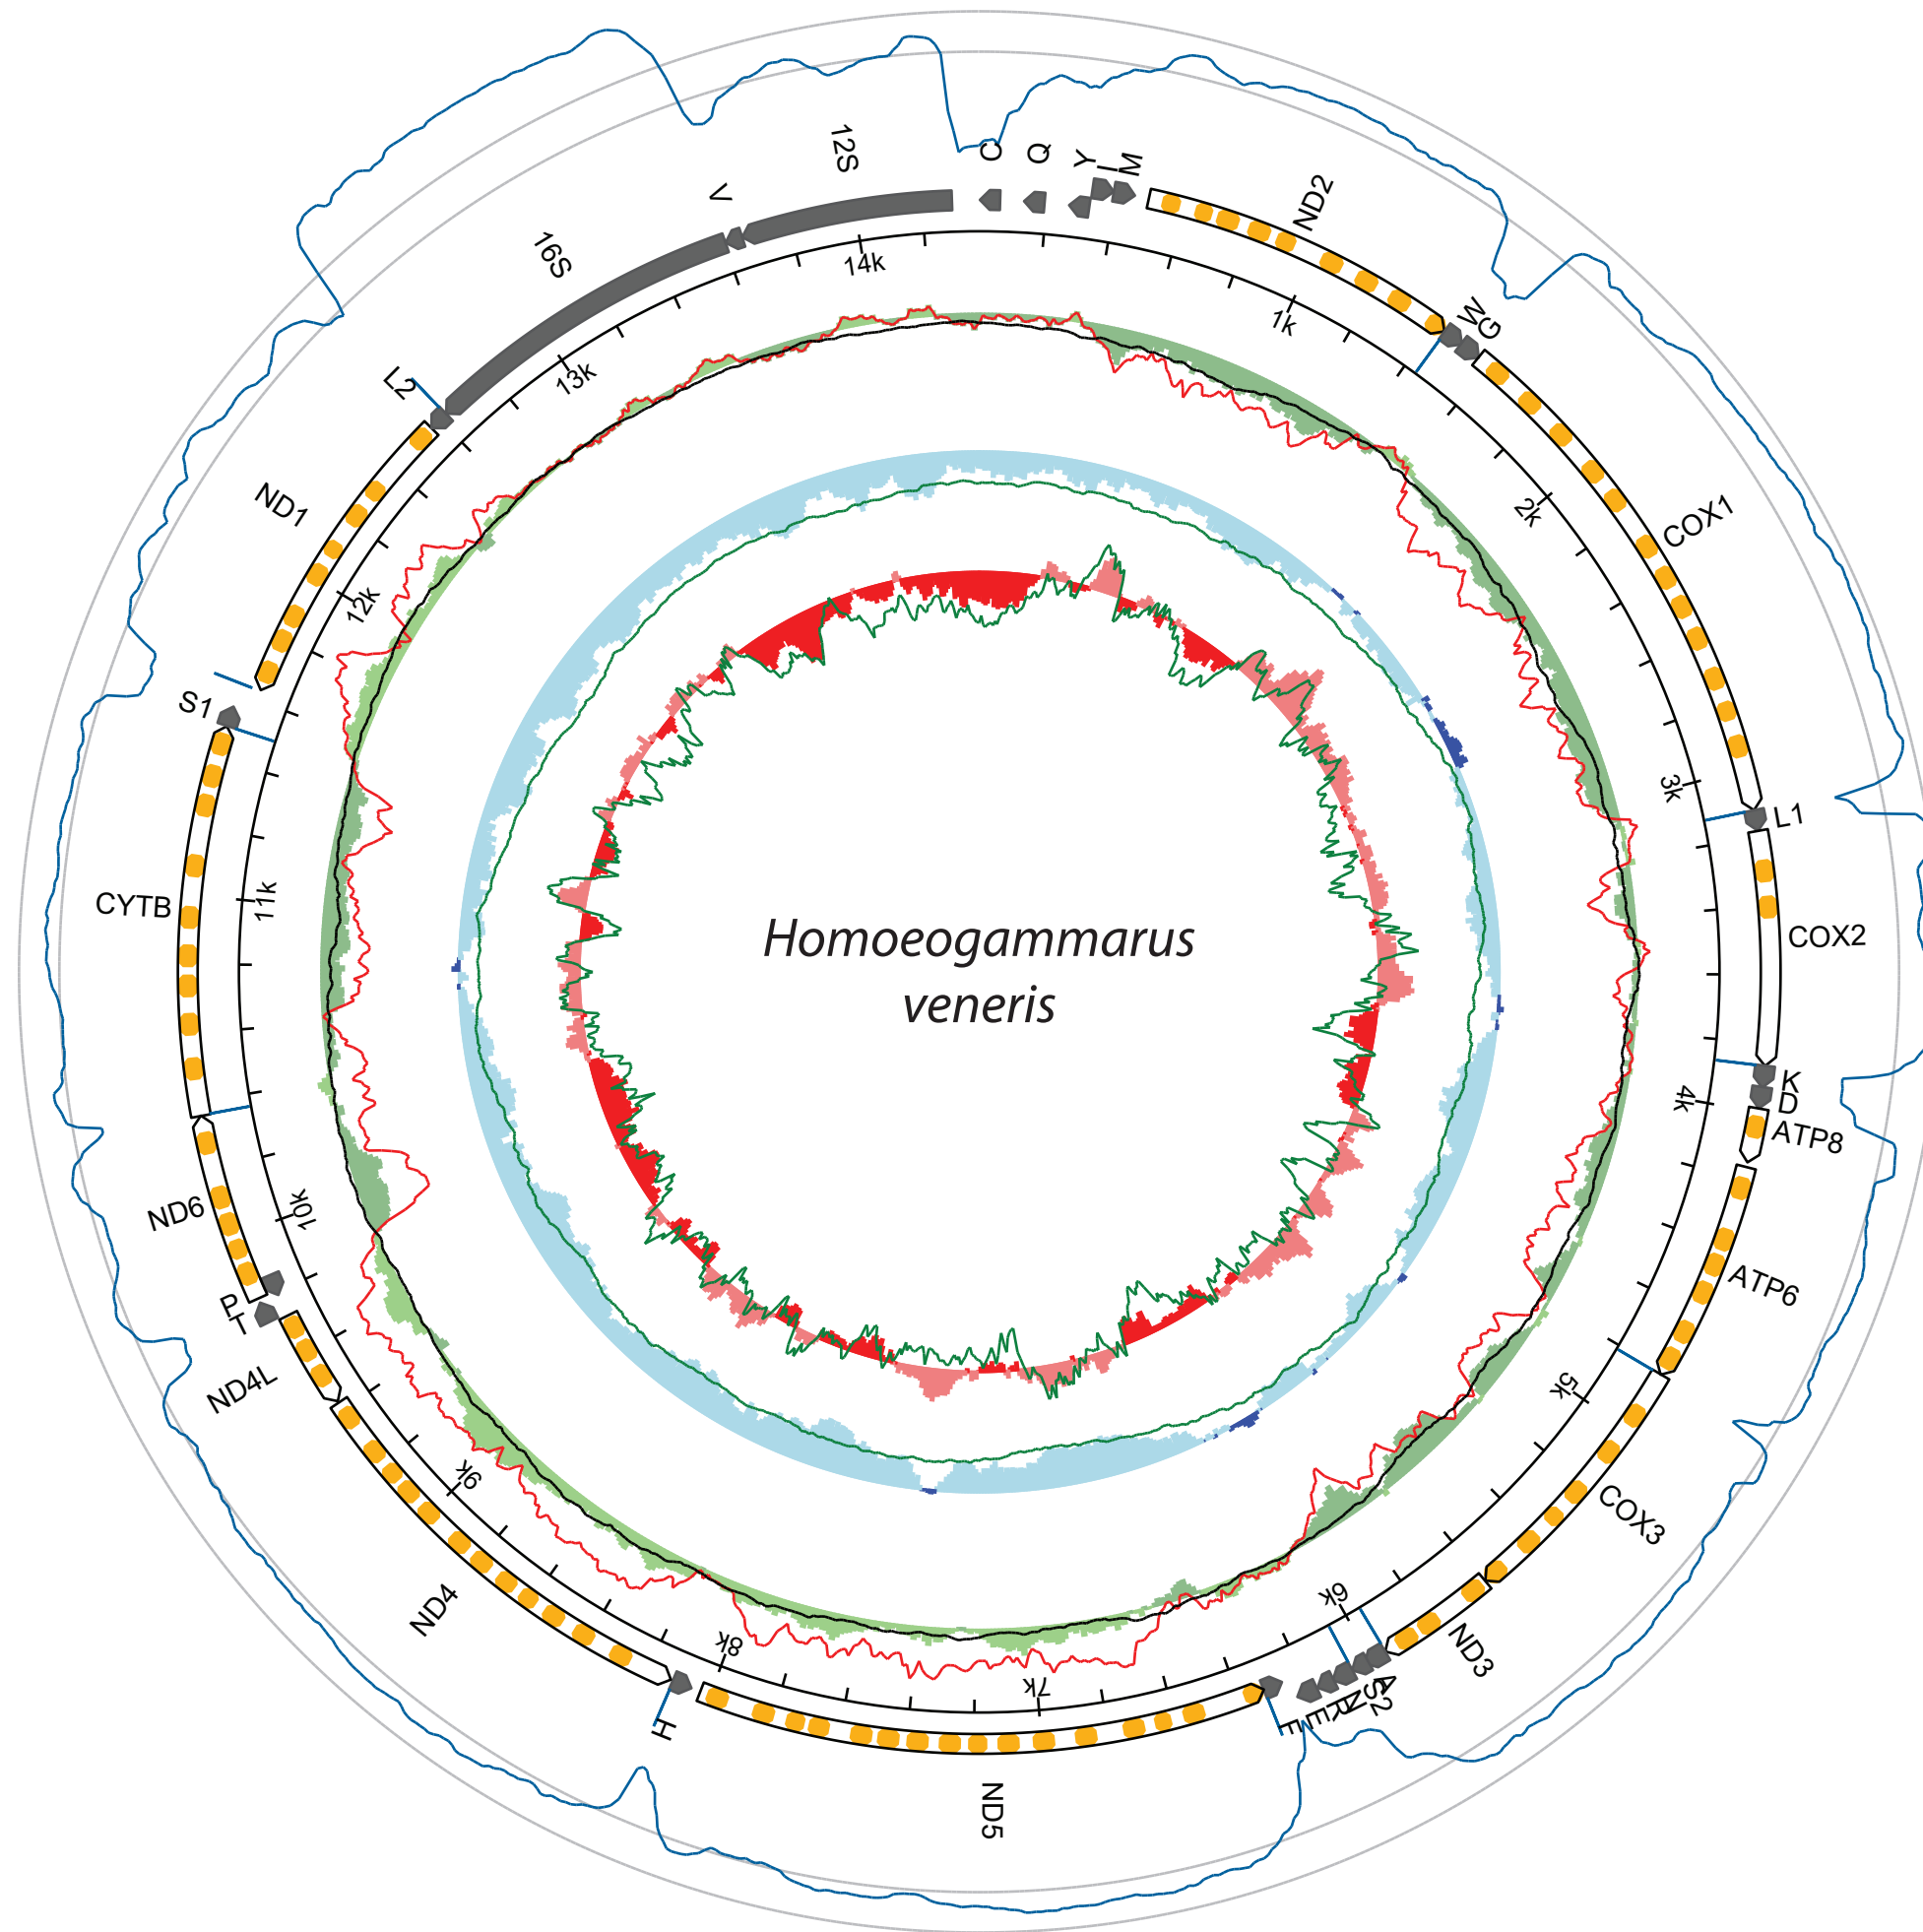

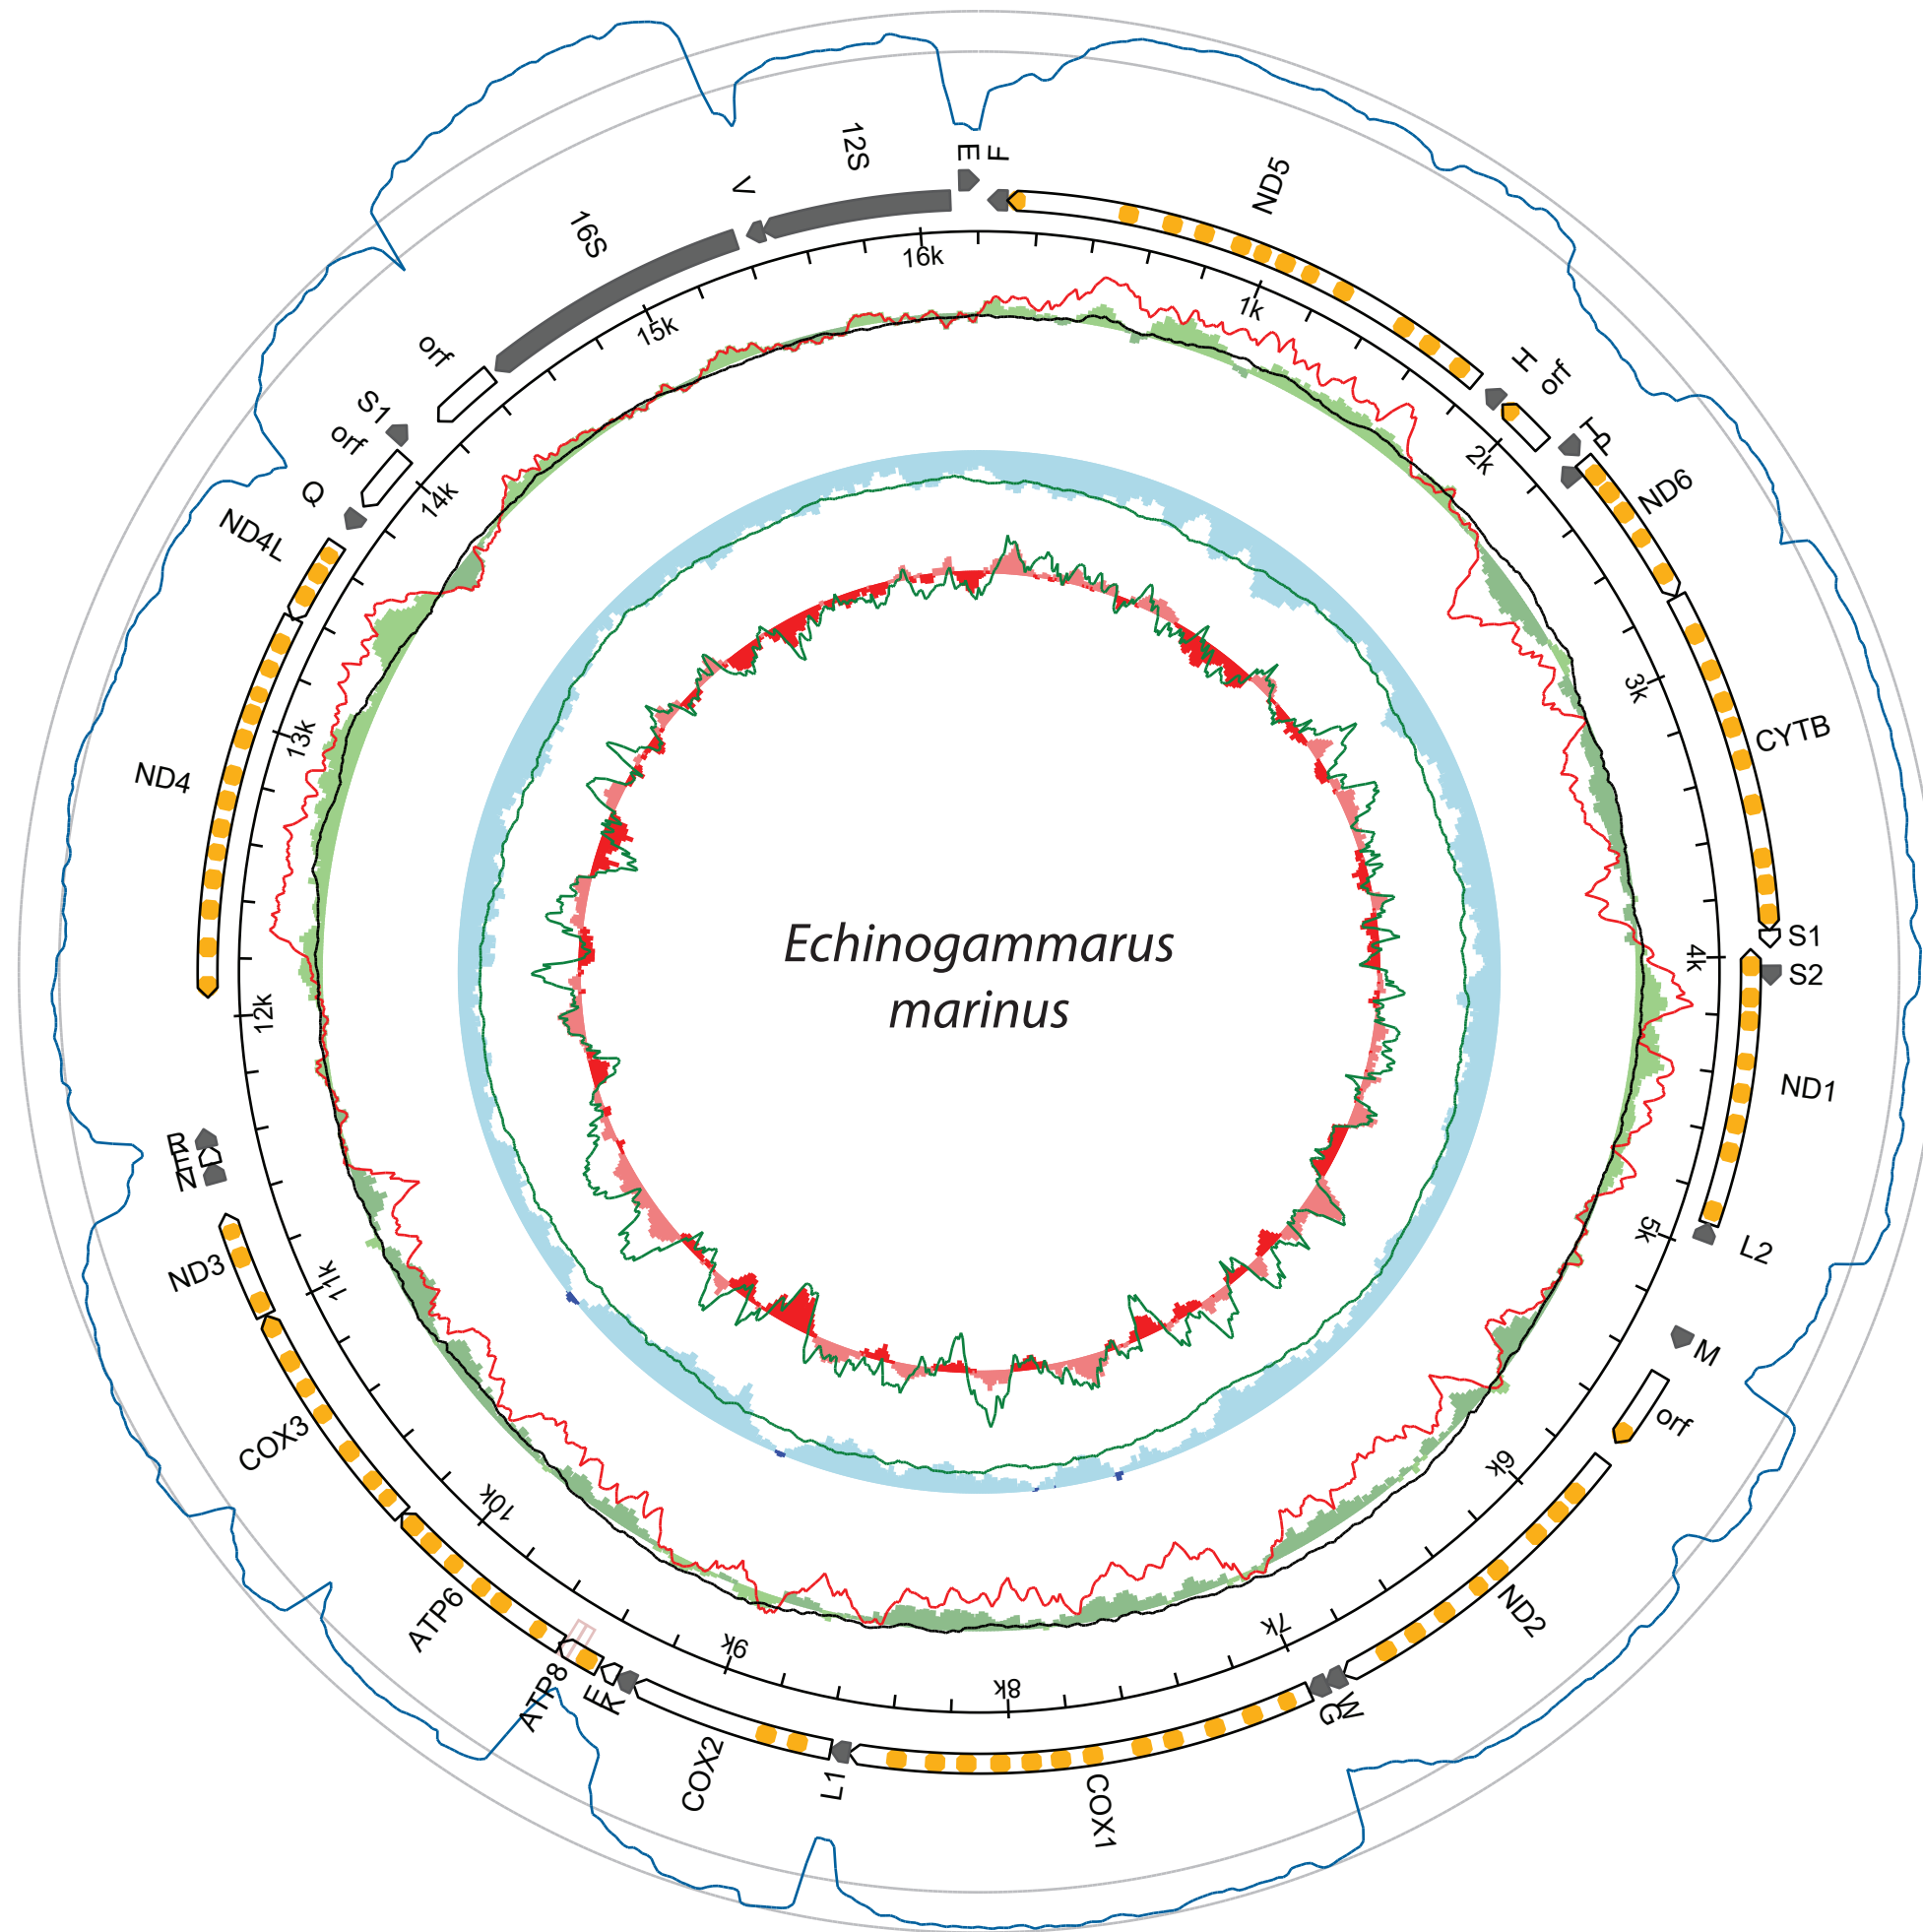

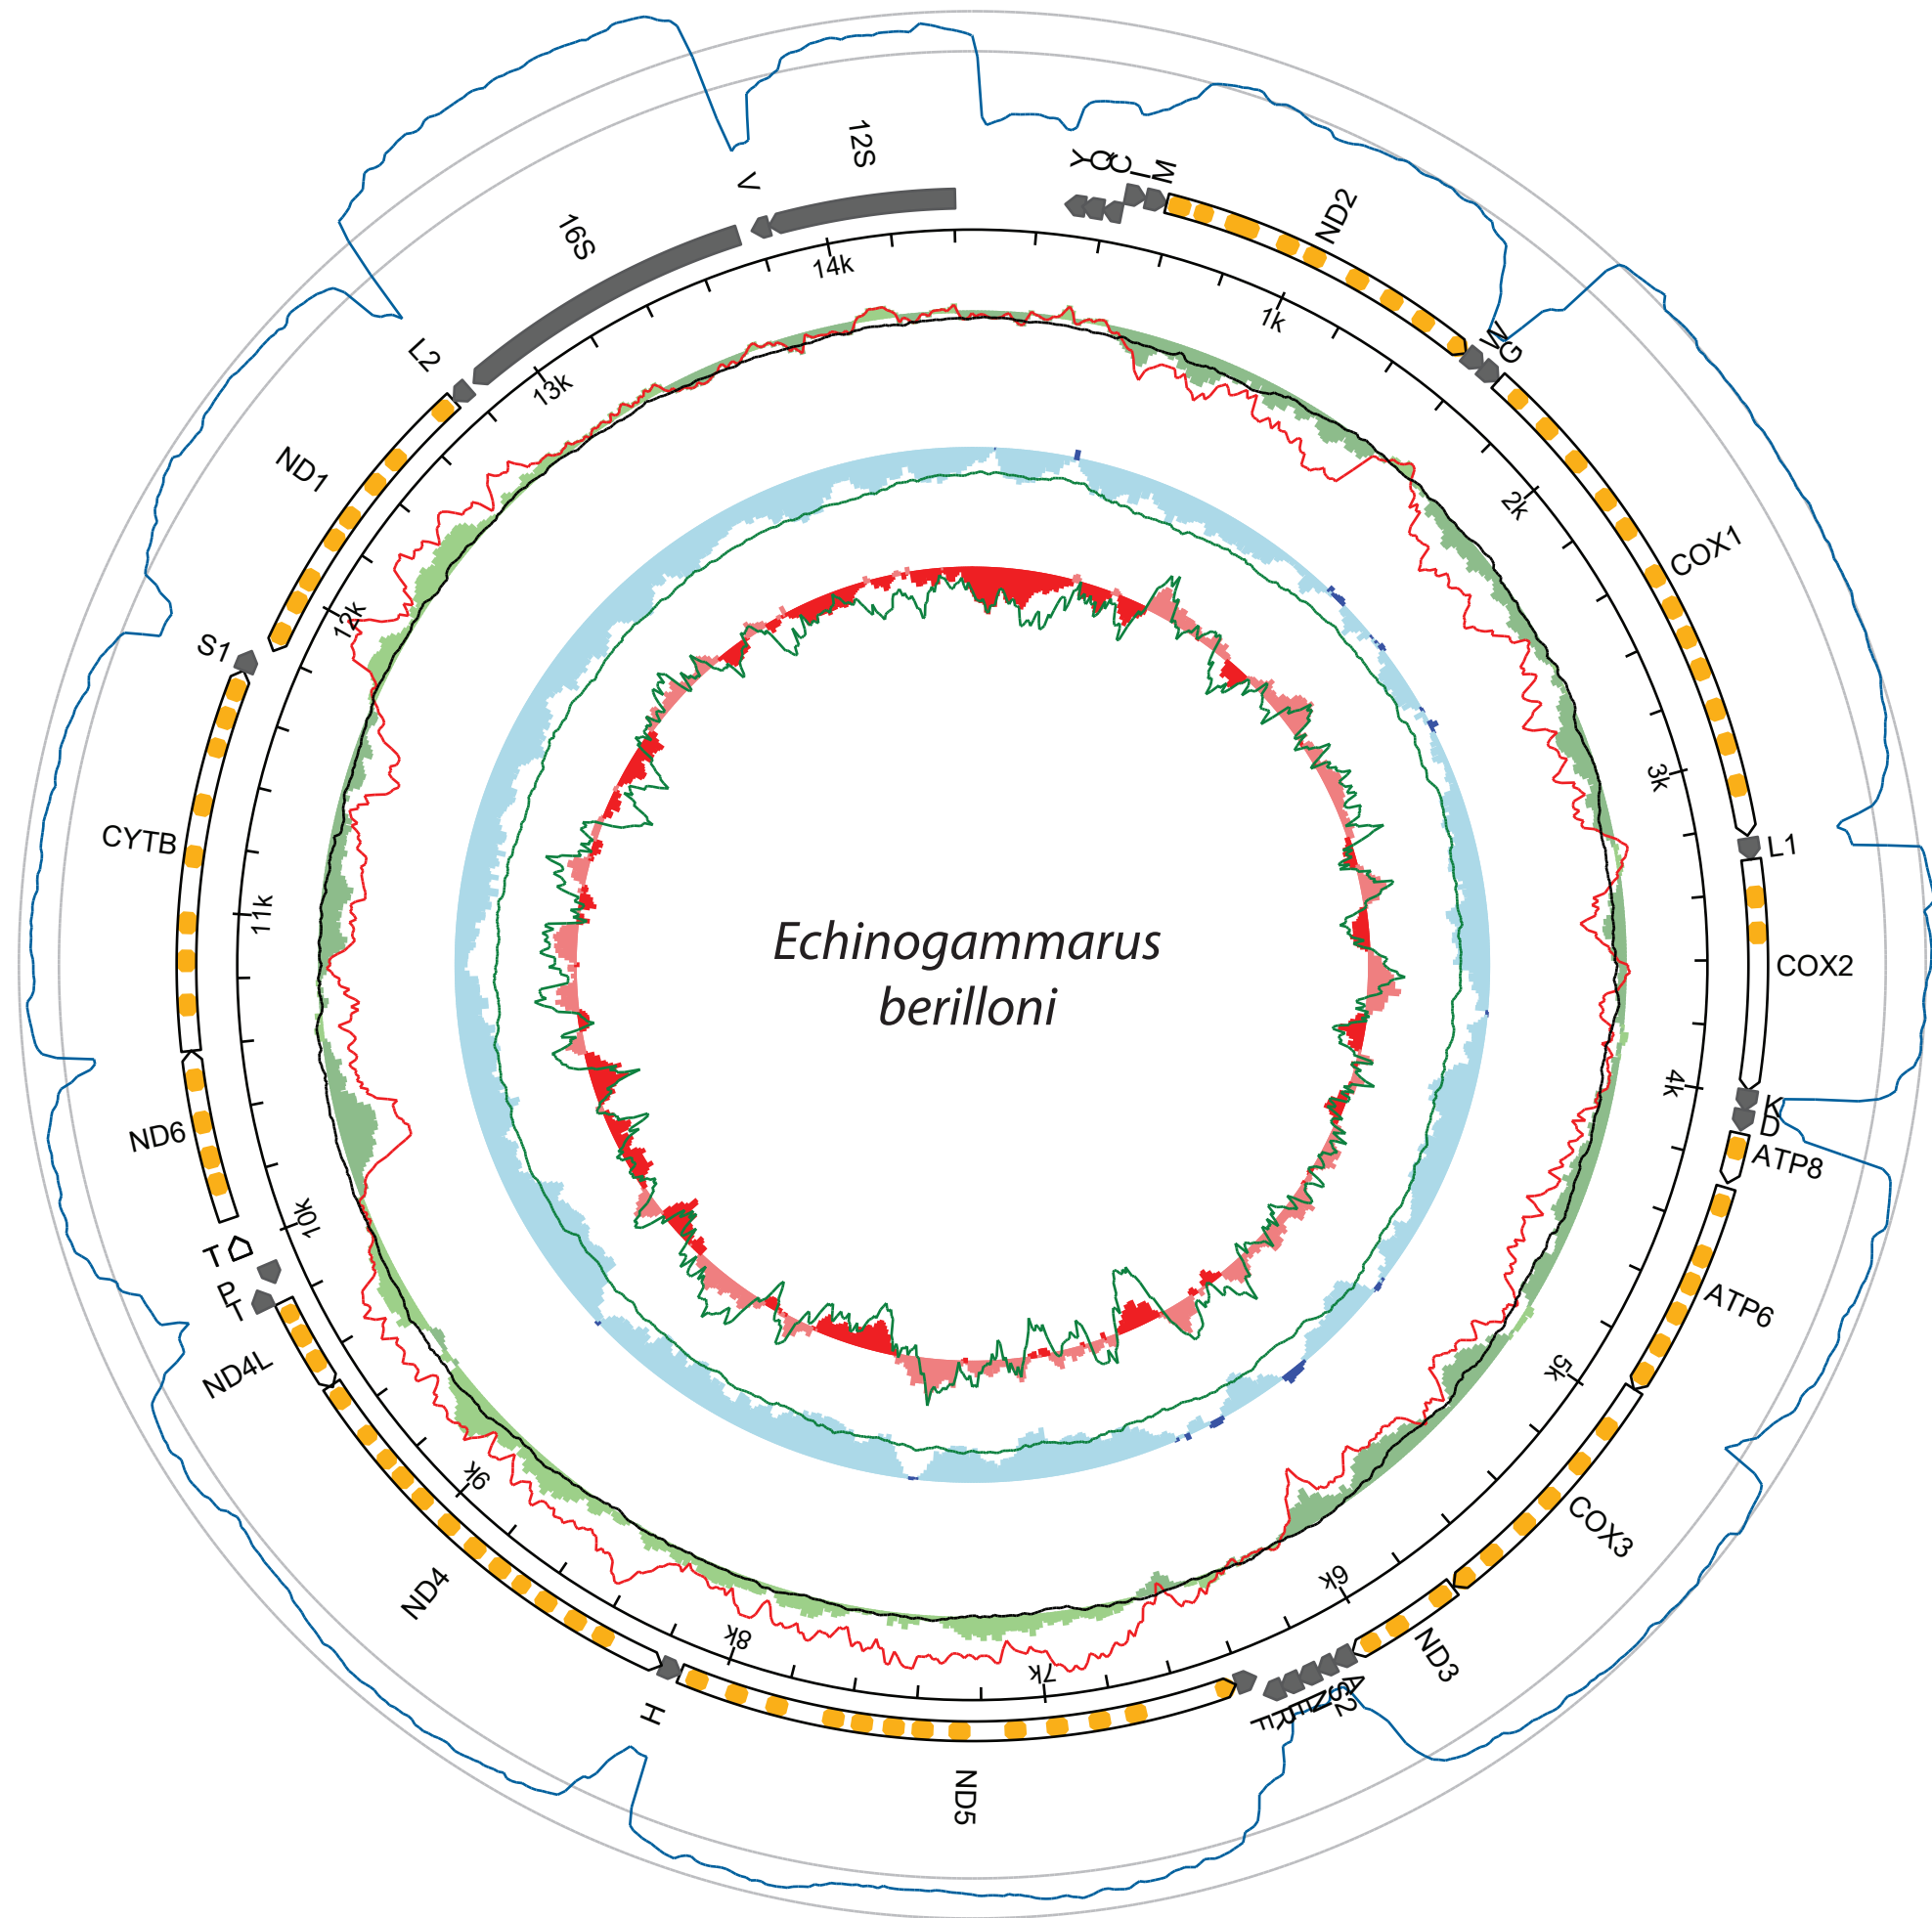

Supplement: s1 [file Fig_S1.pdf › Fig_S1.pdf]
